# Supplementary material for: Novel electrochemi-/photo-luminescence of Ag3Cu5 heterometallic alkynyl clusters
Source: Royal Society of Chemistry journal article supplement (doi:10.1039/c4dt03369h), 2014-12-22
Supplement: c4dt03369h1.pdf [file c4dt03369h1.pdf]

## Supporting Information

### Novel Electrochemi- / Photo-Luminescence of Ag<sub>3</sub>Cu<sub>5</sub> Heterometallic Alkynyl Clusters

*Yi Jiang,<sup>a</sup> Wen-Jing Guo,<sup>a</sup> De-Xian Kong,<sup>a</sup> Jin-Yun Wang,<sup>b</sup> Qiao-Hua Wei,<sup>\*a,b</sup> and Guo-Nan Chen<sup>a</sup>*

<sup>a</sup> Ministry of Education, Fujian Provincial Key Lab of Analysis and Detection for Food Safety, and  
Institute of Nanomedicine and Nanobiosensing, College of Chemistry, Fuzhou University, Fuzhou,  
Fujian 350108, China

<sup>b</sup> State Key Laboratory of Structural Chemistry, Fujian Institute of Research on the Structure of  
Matter and Graduate School of CAS, Fuzhou, Fujian 350002, China, and Beijing Synchrotron  
Radiation Laboratory, Institute of High Energy Physics, Beijing 100039.

E-mail: qhw76@fzu.edu.cn.

## Table of Contents

| <b>content</b>                                     | <b>page</b>  |
|----------------------------------------------------|--------------|
| Cover page                                         | <b>1</b>     |
| Table of Contents                                  | <b>2</b>     |
| Experimental Section                               | <b>3-5</b>   |
| Crystal Structures (Table S1-S2, and Fig. S1)      | <b>6-8</b>   |
| Photophysical Properties (Table S3 and Fig. S2-S3) | <b>9-11</b>  |
| Electrochemistry (Fig. S4)                         | <b>12</b>    |
| Electrochemiluminescence (Fig. S4-S6)              | <b>13-14</b> |
| References                                         | <b>15</b>    |

## Experimental Section

### Materials

All synthetic operations were performed under dry nitrogen atmosphere using Schlenk techniques and vacuum-line systems. The ligand 2,6-bis(diphenylphosphino)pyridine (dpppy) was purchased from Lude Fine Chemical Industry Co., Ltd., China. Phenylacetylene ( $\text{HC}\equiv\text{CC}_6\text{H}_5$ ) and 4-methylphenylacetylene ( $\text{HC}\equiv\text{CC}_6\text{H}_4\text{CH}_3$ -4) were obtained from Acros Organics. All reagents were used as received and solvents were purified by standard methods.  $(\text{AgC}\equiv\text{CC}_6\text{H}_4\text{-R})_n$  ( $\text{R}=\text{H}$ ,  $\text{CH}_3$ )<sup>1</sup> and  $[\text{Cu}_2(\mu\text{-dpppy})_3](\text{ClO}_4)_2$ <sup>2</sup> were prepared according to the published methods.

### Synthesis

**[Ag<sub>3</sub>Cu<sub>5</sub>(C≡CC<sub>6</sub>H<sub>5</sub>)<sub>6</sub>(μ-dpppy)<sub>3</sub>](ClO<sub>4</sub>)<sub>2</sub> (1).** To 5 mL of a  $\text{CHCl}_3/\text{CH}_3\text{OH}$  (4:1, v/v) solution of  $[\text{Cu}_2(\mu\text{-dpppy})_3](\text{ClO}_4)_2$  (50.0 mg, 0.03 mmol) was added  $[\text{Ag}(\text{C}\equiv\text{CC}_6\text{H}_5)]_n$  (19.0 mg, 0.09 mmol) with stirring at room temperature for 12 h to give a yellow solution. Diffusion of *n*-heptane onto the concentrated solution gave yellow crystals of **1**. Yield: 19.0 mg (57%). Elemental analysis (%) calcd for  $\text{C}_{135}\text{H}_{99}\text{N}_3\text{O}_8\text{P}_6\text{Cl}_2\text{Cu}_5\text{Ag}_3$ : C, 58.13; H, 3.58; N, 1.51; found: C, 57.98; H, 3.56; N, 1.55. ESI-MS [ $m/z$  (%): 1295.9 (100)  $[\text{M}-(\text{ClO}_4)_2]^{2+}$ . IR (KBr):  $\nu=2030$  (w,  $\text{C}\equiv\text{C}$ ), 1096 (s,  $\text{ClO}_4^-$ )  $\text{cm}^{-1}$ . <sup>1</sup>H NMR (400.1 MHz,  $\text{CDCl}_3$ , TMS):  $\delta=8.12$  (t,  $J=8$  Hz, 3H), 7.59 (d,  $J=8$  Hz, 9H), 7.41 (d,  $J=8$  Hz, 3H), 7.35-7.24 (m, 12H), 7.20-7.14 (m, 9H), 7.07-7.02 (m, 12H), 6.92 (t,  $J=8$  Hz, 15H), 6.78 (t,  $J=8$  Hz, 12H), 6.58 (d,  $J=8$  Hz, 12H), 6.25 (d,  $J=8$  Hz, 12H) ppm. <sup>31</sup>P {<sup>1</sup>H} NMR (162 MHz,  $\text{CDCl}_3$ ): 4.94 ppm (d,  $J_{\text{Ag-P}}=376$  Hz,  $J_{\text{P-P}}=27$  Hz, AgPPyPAg).

**[Ag<sub>3</sub>Cu<sub>5</sub>(C≡CC<sub>6</sub>H<sub>4</sub>CH<sub>3</sub>-4)<sub>6</sub>(μ-dpppy)<sub>3</sub>](ClO<sub>4</sub>)<sub>2</sub> (2).** To 5 mL of a  $\text{CH}_2\text{Cl}_2/\text{CH}_3\text{OH}/\text{ClCH}_2\text{CH}_2\text{Cl}$  (4:0.5:0.5, v/v/v) solution of  $[\text{Cu}_2(\mu\text{-dpppy})_3](\text{ClO}_4)_2$  (50.0 mg, 0.03 mmol) was added  $[\text{Ag}(\text{C}\equiv\text{CC}_6\text{H}_4\text{CH}_3\text{-4})]_n$  (20.0 mg, 0.09 mmol) with stirring at room temperature for 12 h to give a yellow-orange solution. Diffusion of *n*-hexane onto the concentrated solution gave orange crystals of **2**. Yield: 22.0 mg (64%). Elemental analysis (%) calcd for  $\text{C}_{141}\text{H}_{111}\text{N}_3\text{O}_8\text{P}_6\text{Cl}_2\text{Cu}_5\text{Ag}_3$ : C, 58.93; H, 3.89; N, 1.46; found: C, 58.17; H, 4.03; N, 1.47. ESI-MS [ $m/z$  (%): 1336.6 (100)  $[\text{M}-(\text{ClO}_4)_2]^{2+}$ . IR (KBr):  $\nu=2020$  (w,  $\text{C}\equiv\text{C}$ ), 1096 (s,  $\text{ClO}_4^-$ )  $\text{cm}^{-1}$ . <sup>1</sup>H NMR (400.1 MHz,  $\text{CDCl}_3$ , TMS):  $\delta=8.12$  (t,  $J=8$  Hz, 3H), 7.59 (d,  $J=8$  Hz, 9H), 7.40 (d,  $J=8$  Hz, 3H), 7.35-7.24 (m, 6H), 7.20-7.14 (m, 9H), 7.07-7.02

(m, 12H), 6.92 (t,  $J = 8$  Hz, 15H), 6.78 (t,  $J = 8$  Hz, 12H), 6.58 (d,  $J = 8$  Hz, 12H), 6.25 (d,  $J = 8$  Hz, 12H), 2.29 (s, 18H, CH<sub>3</sub>). ppm. <sup>31</sup>P{<sup>1</sup>H} NMR (162 MHz, CDCl<sub>3</sub>): 4.77 ppm (d,  $J_{\text{Ag-P}} = 372$  Hz, AgPPyPAg;  $^2J_{\text{P-P}} = 28$  Hz, AgPPyPAg)

## Apparatus

Positive-ion ESI-MS spectra were performed on a Thermo Finnigan DECAX-3000 LCQ mass spectrometer using dichloromethane/methanol or acetonitrile/methanol as the mobile phase at the Fujian Institute of Research on the Structure of Matter, the Chinese Academy of Sciences. Elemental analyses (C, H, N) were carried out on a Perkin-Elmer model 240C automatic instrument. IR spectra were recorded on a Nicolet 6700 FT-IR spectrophotometer with KBr pellets. <sup>1</sup>H NMR spectra, with chemical shifts reported relative to tetramethylsilane, and <sup>31</sup>P{<sup>1</sup>H} NMR spectra with chemical shifts relative to 85% H<sub>3</sub>PO<sub>4</sub> external reference were recorded on a Bruker AVANCE 400 MHz spectrometer. UV-Vis absorption spectra were recorded at 298K on a Perkin-Elmer Lambda 25 UV-Vis spectrometer. Steady-state excitation and emission spectra at room temperature were determined on an Edinburgh Analytical Instrument (FLS920 fluorescence spectrometer). Emission lifetimes were determined on an Edinburgh Analytical Instrument (FLS920 fluorescence spectrometer) with a light-emitting diode lamp (405 nm) and analyzed by the use of a program for exponential fits. The luminescence quantum yield of the sample was determined according to

$$\Phi_s = \Phi_r (B_r / B_s) (n_s / n_r)^2 (D_s / D_r) \quad (1)$$

where the subscripts s and r refer to the sample and reference solutions, respectively,  $B = 1 - 10^{-AL}$ .  $A$  is the absorbance at the excitation wavelength,  $L$  is the path length,  $n$  is the refractive index of the solvent, and  $D$  is the integrated emission intensity. A degassed acetonitrile solution of [Ru(bpy)<sub>3</sub>](PF<sub>6</sub>)<sub>2</sub> ( $\Phi_{\text{em}} = 0.062$ )<sup>3</sup> were used as the reference.

## Crystal Structural Determination

The Crystals **1** and **2** coated with epoxy resin were measured on a Mar CCD 165 nm diffractometer by the oscillation scan technique at 193K using the Beijing Synchrotron Radiation Facility with a 3W1A beam ( $\lambda = 0.71000$  Å). The cell refinement and data reduction were computed using the *HKL2000* software.<sup>4</sup> The structure was solved by direct method or the heavy atoms were located from

E-map. The remaining non-hydrogen atoms were determined from successive difference Fourier syntheses. All non-hydrogen atoms were refined anisotropically except those mentioned otherwise. The structure was refined on  $F^2$  by full-matrix least-squares methods using the *SHELXTL-97* program package.<sup>5</sup> The crystallographic parameters and details for data collections and refinements of crystals **1** and **2** are summarized in Table S1. Selected bond distances and angles for complexes **1** and **2** are listed in Table S2.

## Crystal Structures

**Table S1.** Crystallographic data for compounds **1** and **2**.

| Compound                                  | <b>2(1)·5CHCl<sub>3</sub>·2H<sub>2</sub>O</b>                                                                                      | <b>2(2)·CH<sub>2</sub>Cl<sub>2</sub></b>                                                                                          |
|-------------------------------------------|------------------------------------------------------------------------------------------------------------------------------------|-----------------------------------------------------------------------------------------------------------------------------------|
| Empirical formula                         | C <sub>275</sub> H <sub>211</sub> Ag <sub>6</sub> Cl <sub>19</sub> Cu <sub>10</sub> N <sub>6</sub> O <sub>18</sub> P <sub>12</sub> | C <sub>283</sub> H <sub>226</sub> Ag <sub>6</sub> Cl <sub>6</sub> Cu <sub>10</sub> N <sub>6</sub> O <sub>16</sub> P <sub>12</sub> |
| fw                                        | 6215.31                                                                                                                            | 5833.66                                                                                                                           |
| Temperature (K)                           | 193(2)                                                                                                                             | 193(2)                                                                                                                            |
| radiation ( $\lambda$ , Å)                | 0.71000                                                                                                                            | 0.71000                                                                                                                           |
| Crystal system                            | Monoclinic                                                                                                                         | Monoclinic                                                                                                                        |
| Space group                               | <i>P</i> 2(1)/n                                                                                                                    | <i>C</i> 2/c                                                                                                                      |
| <i>a</i> (Å)                              | 18.820 (4)                                                                                                                         | 29.400 (6)                                                                                                                        |
| <i>b</i> (Å)                              | 27.340 (6)                                                                                                                         | 17.068 (3)                                                                                                                        |
| <i>c</i> (Å)                              | 25.240 (5)                                                                                                                         | 48.669 (10)                                                                                                                       |
| $\beta$ (°)                               | 96.94(3)                                                                                                                           | 92.25(3)                                                                                                                          |
| <i>V</i> (Å <sup>3</sup> )                | 12892(5)                                                                                                                           | 24403(8)                                                                                                                          |
| <i>Z</i>                                  | 2                                                                                                                                  | 4                                                                                                                                 |
| $\rho_{\text{calcd}}$ , g/cm <sup>3</sup> | 1.601                                                                                                                              | 1.588                                                                                                                             |
| $\mu$ , mm <sup>-1</sup>                  | 1.585                                                                                                                              | 1.526                                                                                                                             |
| R1 ( <i>F</i> <sub>o</sub> )              | 0.0811                                                                                                                             | 0.0903                                                                                                                            |
| wR2( <i>F</i> <sub>o</sub> <sup>2</sup> ) | 0.2224                                                                                                                             | 0.3118                                                                                                                            |
| GOF                                       | 1.126                                                                                                                              | 1.104                                                                                                                             |

## Crystal Structures

**Table S2.** Selected bond distances (Å) and angles (°) for complexes **1** and **2**.

|            | <b>2(1)·5CHCl<sub>3</sub>·2H<sub>2</sub>O</b> |            |                   |            | <b>2(2)·CH<sub>2</sub>Cl<sub>2</sub></b> |            |                   |            |
|------------|-----------------------------------------------|------------|-------------------|------------|------------------------------------------|------------|-------------------|------------|
| Ag – Cu    | Ag(1)-Cu(1)                                   | 2.659(2)   | Ag(3)-Cu(2)       | 2.615(2)   | Ag(1)-Cu(1)                              | 2.6453(12) | Ag(3)-Cu(3)       | 2.6432(13) |
|            | Ag(1)-Cu(3)                                   | 2.641(2)   | Ag(3)-Cu(3)       | 2.648(2)   | Ag(1)-Cu(3)                              | 2.6525(14) | Ag(3)-Cu(2)       | 2.6738(13) |
|            | Ag(1)-Cu(5)                                   | 3.216(2)   | Ag(3)-Cu(5)       | 3.170(2)   | Ag(1)-Cu(4)                              | 3.1717(13) | Ag(3)-Cu(4)       | 3.1844(13) |
|            | Ag(2)-Cu(1)                                   | 2.632(2)   |                   |            | Ag(2)-Cu(1)                              | 2.6682(13) |                   |            |
|            | Ag(2)-Cu(2)                                   | 2.645(2)   |                   |            | Ag(2)-Cu(2)                              | 2.6591(13) |                   |            |
|            | Ag(2)-Cu(5)                                   | 3.160(2)   |                   |            | Ag(2)-Cu(4)                              | 3.1552(14) |                   |            |
| Cu – Cu    | Cu(1)-Cu(5)                                   | 2.531(2)   | Cu(3)-Cu(4)       | 2.574(3)   | Cu(1)-Cu(4)                              | 2.5393(15) | Cu(3)-Cu(5)       | 2.6178(15) |
|            | Cu(1)-Cu(4)                                   | 2.561(3)   | Cu(3)-Cu(5)       | 2.604(2)   | Cu(1)-Cu(5)                              | 2.6628(15) | Cu(3)-Cu(4)       | 2.6191(16) |
|            | Cu(2)-Cu(5)                                   | 2.548(3)   | Cu(4)-Cu(5)       | 2.684(2)   | Cu(2)-Cu(4)                              | 2.6003(15) | Cu(4)-Cu(5)       | 2.7403(16) |
|            | Cu(2)-Cu(4)                                   | 2.561(2)   |                   |            | Cu(2)-Cu(5)                              | 2.6262(14) |                   |            |
| Ag – C     | Ag(1)-C(21)                                   | 2.519(15)  | Ag(2)-C(1)        | 2.515(16)  | Ag(1)-C(41)                              | 2.562(9)   | Ag(3)-C(31)       | 2.490(9)   |
|            | Ag(1)-C(41)                                   | 2.644(15)  | Ag(3)-C(11)       | 2.609(15)  | Ag(1)-C(61)                              | 2.594(9)   | Ag(3)-C(71)       | 2.689(10)  |
|            |                                               |            |                   |            | Ag(2)-C(21)                              | 2.505(9)   |                   |            |
| Cu – C     | Cu(1)-C(41)                                   | 1.927(15)  | Cu(3)-C(51)       | 1.945(17)  | Cu(1)-C(61)                              | 1.924(9)   | Cu(4)-C(21)       | 2.037(10)  |
|            | Cu(1)-C(1)                                    | 1.936(15)  | Cu(4)-C(31)       | 2.053(14)  | Cu(1)-C(21)                              | 1.976(9)   | Cu(4)-C(41)       | 2.062(9)   |
|            | Cu(2)-C(11)                                   | 1.927(15)  | Cu(4)-C(41)       | 2.060(15)  | Cu(2)-C(51)                              | 1.931(10)  | Cu(4)-C(31)       | 2.061(9)   |
|            | Cu(2)-C(31)                                   | 1.967(15)  | Cu(4)-C(51)       | 2.089(14)  | Cu(2)-C(31)                              | 1.963(9)   | Cu(5)-C(51)       | 2.124(10)  |
|            | Cu(3)-C(21)                                   | 1.918(16)  | Cu(5)-C(1)        | 2.061(15)  | Cu(3)-C(71)                              | 1.931(10)  | Cu(5)-C(71)       | 2.132(11)  |
|            |                                               |            | Cu(5)-C(11)       | 2.034(15)  | Cu(3)-C(41)                              | 1.935(9)   | Cu(5)-C(61)       | 2.135(12)  |
| Cu – N     | Cu(1)-N(1)                                    | 2.057(12)  | Cu(3)-N(3)        | 2.060(12)  | Cu(1)-N(1)                               | 2.088(7)   | Cu(3)-N(3)        | 2.066(7)   |
|            | Cu(2)-N(2)                                    | 2.049(12)  |                   |            | Cu(2)-N(2)                               | 2.071(7)   |                   |            |
| P – Ag – P | P(1)-Ag(1)-P(6)                               | 115.44(15) | P(5)-Ag(3)-P(4)   | 120.70(14) | P(1)-Ag(1)-P(6)                          | 117.97(8)  | P(5)-Ag(3)-P(4)   | 118.35(8)  |
|            | P(3)-Ag(2)-P(2)                               | 118.11(14) |                   |            | P(3)-Ag(2)-P(2)                          | 119.73(8)  |                   |            |
| P – Ag – C | P(1)-Ag(1)-C(21)                              | 122.9(4)   | P(2)-Ag(2)-C(1)   | 90.9(3)    | P(1)-Ag(1)-C(41)                         | 120.5(2)   | C(21)-Ag(2)-P(2)  | 89.9(2)    |
|            | P(6)-Ag(1)-C(21)                              | 91.5(3)    | P(5)-Ag(3)-C(11)  | 124.7(3)   | P(6)-Ag(1)-C(41)                         | 87.6(2)    | C(31)-Ag(3)-P(5)  | 122.6(2)   |
|            | P(3)-Ag(2)-C(1)                               | 125.1(3)   | P(4)-Ag(3)-C(11)  | 90.6(4)    | P(3)-Ag(2)-C(21)                         | 123.9(2)   | C(31)-Ag(3)-P(4)  | 90.1(2)    |
| C – Cu – C | C(41)-Cu(1)-C(1)                              | 162.2(6)   | C(31)-Cu(4)-C(51) | 113.4(6)   | C(61)-Cu(1)-C(21)                        | 162.4(5)   | C(41)-Cu(4)-C(31) | 113.1(3)   |
|            | C(11)-Cu(2)-C(31)                             | 163.5(6)   | C(21)-Cu(5)-C(1)  | 116.5(6)   | C(51)-Cu(2)-C(31)                        | 161.6(5)   | C(51)-Cu(5)-C(61) | 116.2(4)   |
|            | C(21)-Cu(3)-C(51)                             | 160.2(6)   | C(21)-Cu(5)-C(11) | 117.0(5)   | C(71)-Cu(3)-C(41)                        | 162.5(4)   | C(51)-Cu(5)-C(71) | 117.4(4)   |
|            | C(41)-Cu(4)-C(31)                             | 120.1(6)   | C(1)-Cu(5)-C(11)  | 112.6(6)   | C(21)-Cu(4)-C(41)                        | 117.2(4)   | C(61)-Cu(5)-C(71) | 118.4(4)   |
|            | C(41)-Cu(4)-C(51)                             | 111.4(6)   |                   |            | C(21)-Cu(4)-C(31)                        | 114.4(3)   |                   |            |
| C – Cu – N | C(41)-Cu(1)-N(1)                              | 97.1(5)    | C(31)-Cu(2)-N(2)  | 95.6(5)    | C(61)-Cu(1)-N(1)                         | 104.6(4)   | C(31)-Cu(2)-N(2)  | 93.5(3)    |
|            | C(1)-Cu(1)-N(1)                               | 99.7(6)    | C(21)-Cu(3)-N(3)  | 99.0(6)    | C(21)-Cu(1)-N(1)                         | 92.9(3)    | C(71)-Cu(3)-N(3)  | 106.7(4)   |
|            | C(11)-Cu(2)-N(2)                              | 100.9(5)   | C(51)-Cu(3)-N(3)  | 100.7(5)   | C(51)-Cu(2)-N(2)                         | 104.8(4)   | C(41)-Cu(3)-N(3)  | 90.7(3)    |

## Crystal Structures

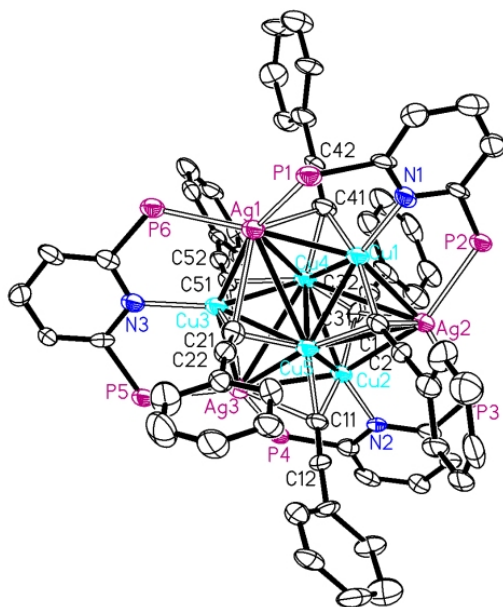

**Fig. S1.** ORTEP drawing of the cation of complex **1** with atom labelling scheme showing 30% thermal ellipsoids. Phenyl rings on the phosphorus atoms and hydrogen atoms are omitted for clarity.



## Photophysical Properties

**Table S3.** Photophysical data for **1** and **2** at room temperature.

| Compound | Medium                                             | $\lambda_{\text{abs}}/\text{nm}$<br>( $\epsilon \times 10^{-5} / \text{dm}^3 \text{mol}^{-1} \text{cm}^{-1}$ ) | $\lambda_{\text{em}}/\text{nm}$ ( $\tau_{\text{em}}/\mu\text{s}$ ) <sup>a</sup> | $\Phi_{\text{em}}$ <sup>b</sup> |
|----------|----------------------------------------------------|----------------------------------------------------------------------------------------------------------------|---------------------------------------------------------------------------------|---------------------------------|
| <b>1</b> | solid                                              |                                                                                                                | 590 (0.71)                                                                      |                                 |
|          | CH <sub>2</sub> Cl <sub>2</sub>                    | 235 (1.90), 246 (1.67), 273 (0.88), 417 (0.05)                                                                 | 595 (0.20)                                                                      | 0.015                           |
|          | CH <sub>3</sub> CN                                 | 206 (2.40), 234 (1.39), 270 (0.69), 417 (0.05)                                                                 | 602 (0.10)                                                                      | 0.004                           |
|          | CH <sub>3</sub> CN/H <sub>2</sub> O<br>(10:90,v/v) | 234 (1.40), 244 (1.24), 272 (0.89), 425 (0.15)                                                                 | 592 (0.18)                                                                      | 0.062                           |
| <b>2</b> | solid                                              |                                                                                                                | 594 (0.79)                                                                      |                                 |
|          | CH <sub>2</sub> Cl <sub>2</sub>                    | 264 (2.05), 251 (1.87), 276 (0.96), 427 (0.05)                                                                 | 604 (0.23)                                                                      | 0.013                           |
|          | CH <sub>3</sub> CN                                 | 207 (3.22), 237 (1.45), 272 (0.82), 427 (0.04)                                                                 | 609 (0.10)                                                                      | 0.007                           |
|          | CH <sub>3</sub> CN/H <sub>2</sub> O<br>(10:90,v/v) | 233 (1.61), 244 (1.42), 276 (1.03), 436 (0.16)                                                                 | 604 (0.10)                                                                      | 0.058                           |

<sup>a</sup> The excitation wavelength in the lifetime measurements are at 405 nm. <sup>b</sup> The quantum yields were measured using [Ru(bpy)<sub>3</sub>](PF<sub>6</sub>)<sub>2</sub> as a standard.<sup>3</sup>

## Photophysical Properties

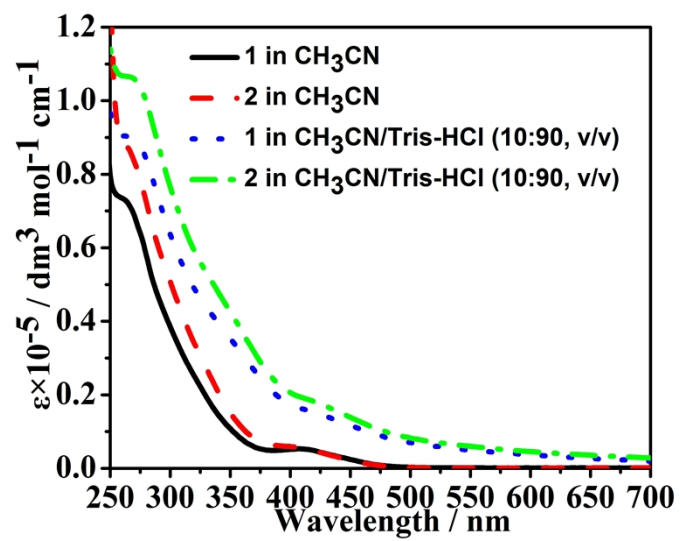

**Fig. S2.** UV–Vis spectra of complexes **1** and **2** in  $\text{CH}_3\text{CN}$  solution and  $\text{CH}_3\text{CN}/\text{Tris-HCl}$  (10:90, v/v, pH 9.0) mixture.

## Photophysical Properties

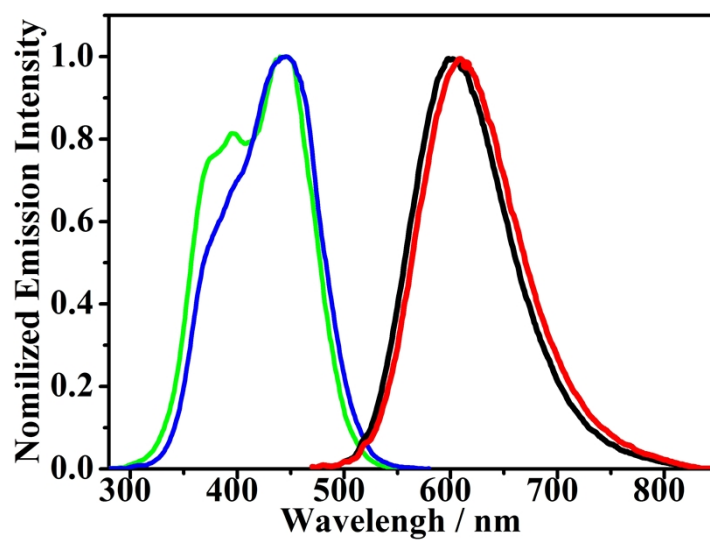

**Fig. S3.** Excitations and emissions of 0.1 mM **1** (green and black line, respectively) and **2** (blue and red line, respectively) in CH<sub>3</sub>CN solution,  $\lambda_{\text{ex}}$  = 450 nm.

## Electrochemistry

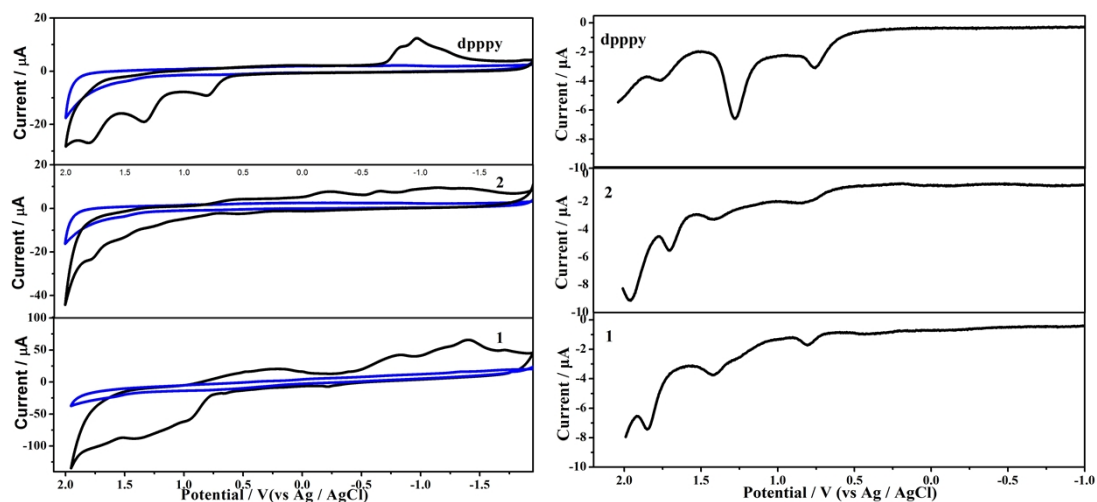

**Fig. S4.** CVs (left) and DPV (right) of 0.1 mM **1**, **2** and 1.0 mM dpppy ligand in deaerated  $\text{CH}_3\text{CN}$  (0.1 M TBAP) at GCE. Scan rate,  $100 \text{ mv s}^{-1}$ . The blue lines represent the CVs in the blank solution under the same experimental conditions.

## Electrochemiluminescence

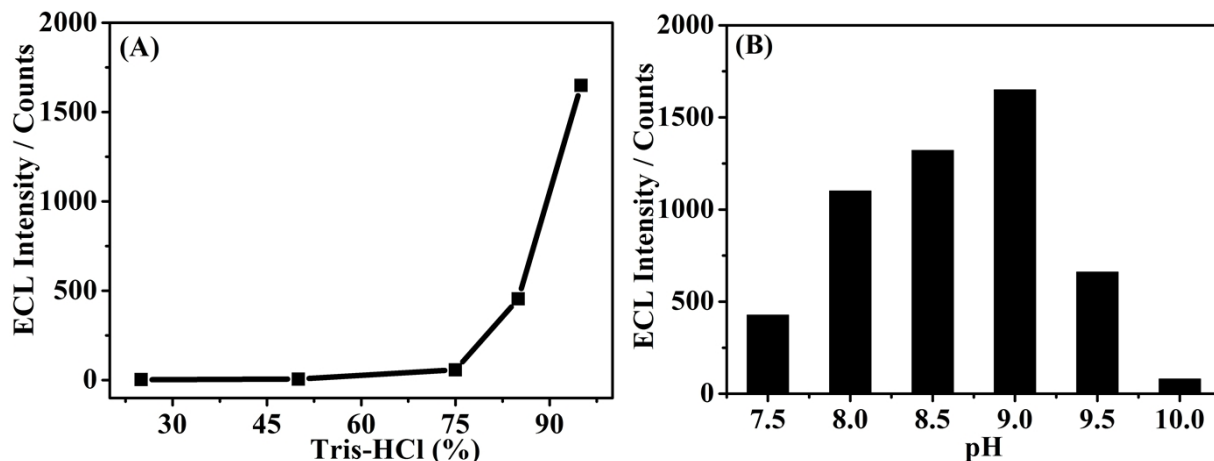

**Fig. S5.** The ECL responses of 10  $\mu\text{M}$  **1** in a solution containing (A) 0.05 M pH 9.0 Tris-HCl /  $\text{CH}_3\text{CN}$  solution with different ratio of Tris-HCl buffer solutions, and (B) 0.05 M Tris-HCl (95%) and  $\text{CH}_3\text{CN}$  (5%) at various pH on GC working electrode. Scan rate, 100  $\text{mv s}^{-1}$ .

## Electrochemiluminescence

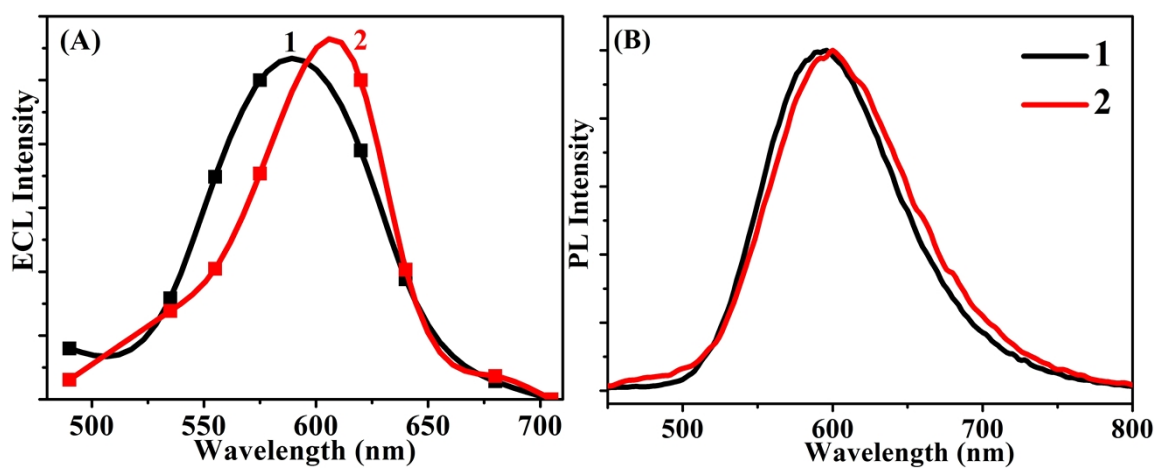

**Fig. S6.** ECL (A) and PL spectra (B) of **1** and **2** in a solution containing 0.05 M pH 9.0 Tris-HCl (95%) and CH<sub>3</sub>CN (5%) solution.

## References

- 1 I. O. Koshevoy, A. J. Karttunen, Y. C. Lin, C. C. Lin, P. T. Zhou, S. P. Tunik, M. Haukka and T. A. Pakkanen, *Dalton Trans.* 2010, **39**, 2395-2403.
- 2 S. F. John, J. H. Raymond and W. Barry, *Polyhedron*, 1996, 15, 3741-3748.
- 3 J. V. Caspar and T. J. Meyer, *J. Am. Chem. Soc.* 1983, **105**, 5583-5590.
- 4 P. R. Evans, Proceedings of the CCP4 Study Weekend. *Recent Advances in Phasing*; K. S. Wilson, G. Davies, A. W. Ashton, S. Bailey, Eds. Daresbury Laboratory: Warrington, U.K. 1997.
- 5 G. M. Sheldrick, *SHELXL-97*, Program for the Refinement of Crystal Structures; University of Göttingen, Göttingen, Germany, 1997.
